# Supplementary material for: Elevated serum polyclonal immunoglobulin free light chains in patients with severe asthma
Source: Front Pharmacol. 2023 Jun 16;14:1126535. doi: 10.3389/fphar.2023.1126535 (PMC10311563; doi:10.3389/fphar.2023.1126535)
Supplement: Supplementary file 17 [file DataSheet7.xls]

## Sheet: p values correlation table.csv
	FVC_perc_pred	FVC_perc_pred_post	FEV1/FVC	FEF25-75_perc_pred	FEV1/FVC_post	FEF25-75percpred_p	FVC_post	PEF_post	FEV1_perc_pred_pos	PEF_perc_pred_post	FEV1_perc_pred	PEF_perc_pred	FEF25-75	FEF25-75_post	FVC	PEF	FEV1	FEV1_post	K/L	FENO	Total_IgE	Specific_IgE	Eosinoph_number	Eosinoph_percent	Kfree	Lfree	KplusL	Age	Neutroph_number	Neutroph_percent	Pack/years	CRP
FVC_perc_pred	NA	5.5511e-10	0.0002333	0.071246	0.002579	0.01049	8.628e-06	0.086419	4.4409e-12	0.00010057	0	8.8818e-11	0.00038122	0.00078148	8.9706e-10	1.5329e-05	1.2657e-08	5.8482e-06	0.60564	0.52027	0.12637	0.76823	0.60365	0.9352	0.57438	0.39407	0.44108	0.06929	0.011856	0.00092451	0.032352	0.026791
FVC_perc_pred_post	5.5511e-10	NA	0.28881	0.12001	0.89624	0.72222	3.0939e-06	0.051826	0	3.3877e-06	0.010471	0.008939	0.012877	0.12504	0.21966	0.00074123	0.00026786	1.221e-05	0.84293	0.69612	0.6343	0.68698	0.49874	0.85554	0.646	0.70604	0.67075	0.019721	0.021423	0.011769	0.32224	0.42374
FEV1/FVC	0.0002333	0.28881	NA	0	0	1.251e-06	0.00025895	0.054119	4.593e-06	0.0002367	0	7.6592e-08	0	4.9529e-07	0.015555	2.2367e-05	6.0307e-09	1.8924e-05	0.83977	0.25186	0.67286	0.84951	0.13245	0.017845	0.0033839	0.003612	0.002427	9.7122e-07	1.2158e-07	1.088e-11	0.0083072	0.00014274
FEF25-75_perc_pred	0.071246	0.12001	0	NA	5.0573e-05	4.4409e-11	0.00020666	0.085631	0.00079225	0.26794	4.4409e-12	3.956e-06	0	2.7112e-05	0.0023982	2.0706e-05	2.1667e-08	0.00034046	0.94839	0.3635	0.41394	0.72901	0.10458	0.028347	0.042874	0.039988	0.033746	0.039795	1.5626e-06	2.4136e-08	0.014111	0.0012106
FEV1/FVC_post	0.002579	0.89624	0	5.0573e-05	NA	3.4853e-07	0.0055891	0.00014257	0	5.2292e-08	2.4215e-05	0.00080018	5.475e-07	4.8539e-08	0.0001852	0.027973	9.736e-05	9.1438e-09	0.83662	0.4572	0.9157	0.48837	0.43139	0.067369	0.003795	0.011893	0.005738	0.00011973	0.0019883	3.9986e-05	0.01682	0.00094798
FEF25-75percpred_p	0.01049	0.72222	1.251e-06	4.4409e-11	3.4853e-07	NA	0.0026967	0.00012301	2.3754e-08	0.00010171	2.3715e-06	0.00074235	2.7509e-05	0	0.010639	0.00031941	5.6639e-05	1.5032e-06	0.47014	0.59625	0.97366	0.27869	0.44003	0.15918	0.0019117	0.025741	0.0078835	0.18458	0.0049308	0.00036408	0.040766	0.0041182
FVC_post	8.628e-06	3.0939e-06	0.00025895	0.00020666	0.0055891	0.0026967	NA	0	8.2157e-11	2.0428e-10	1.0728e-05	1.3667e-07	7.4694e-07	8.8818e-12	0	0	0	0	0.53896	0.78348	0.60981	0.51466	0.26776	0.066899	0.013579	0.017006	0.011915	1.3956e-05	0.007808	0.017734	0.083243	0.022579
PEF_post	0.086419	0.051826	0.054119	0.085631	0.00014257	0.00012301	0	NA	2.2122e-08	0	6.1536e-05	0	2.3245e-05	5.3912e-09	0	0	2.2204e-12	0	0.71828	0.18055	0.47288	0.65201	0.80943	0.40683	0.048772	0.057911	0.045388	0.001318	0.00097871	8.9818e-05	0.028733	0.0022194
FEV1_perc_pred_pos	4.4409e-12	0	4.593e-06	0.00079225	0	2.3754e-08	8.2157e-11	2.2122e-08	NA	0	0	1.2434e-10	2.2035e-06	8.8818e-11	7.6856e-07	1.3475e-06	6.0507e-09	0	0.96577	0.72129	0.6355	0.57976	0.96698	0.40127	0.069247	0.094595	0.072776	0.015526	0.0015312	2.4426e-05	0.020162	0.0034414
PEF_perc_pred_post	0.00010057	3.3877e-06	0.0002367	0.26794	5.2292e-08	0.00010171	2.0428e-10	0	0	NA	5.2451e-08	0	0.0001226	1.6016e-07	2.5919e-06	0	4.1477e-07	0	0.81718	0.35691	0.83571	0.74698	0.29578	0.73765	0.26162	0.32803	0.28286	0.28881	0.0014273	7.7678e-06	0.03007	0.0023952
FEV1_perc_pred	0	0.010471	0	4.4409e-12	2.4215e-05	2.3715e-06	1.0728e-05	6.1536e-05	0	5.2451e-08	NA	0	0	3.153e-11	0	4.4409e-12	0	8.8818e-12	0.81045	0.43983	0.27846	0.76324	0.58652	0.21709	0.070639	0.053426	0.050371	7.0726e-05	2.0792e-08	8.8818e-12	0.006621	0.00045056
PEF_perc_pred	8.8818e-11	0.008939	7.6592e-08	3.956e-06	0.00080018	0.00074235	1.3667e-07	0	1.2434e-10	0	0	NA	1.1458e-09	2.1707e-08	0	0	0	8.8818e-12	0.80533	0.71643	0.56497	0.7836	0.80333	0.74057	0.14855	0.10472	0.10656	0.0053325	5.5008e-07	1.199e-10	0.01378	0.00049887
FEF25-75	0.00038122	0.012877	0	0	5.475e-07	2.7509e-05	7.4694e-07	2.3245e-05	2.2035e-06	0.0001226	0	1.1458e-09	NA	0	0	2.2204e-11	0	0	0.99916	0.49008	0.9399	0.21019	0.037929	0.0034423	0.0021954	0.0043669	0.0023078	8.8818e-12	4.0036e-07	1.0858e-08	0.004603	0.0011759
FEF25-75_post	0.00078148	0.12504	4.9529e-07	2.7112e-05	4.8539e-08	0	8.8818e-12	5.3912e-09	8.8818e-11	1.6016e-07	3.153e-11	2.1707e-08	0	NA	8.8818e-12	6.5503e-10	0	0	0.59206	0.69667	0.56615	0.089845	0.135	0.017241	0.00013938	0.0033221	0.00069326	1.168e-10	0.00030259	2.4192e-05	0.012505	0.0032764
FVC	8.9706e-10	0.21966	0.015555	0.0023982	0.0001852	0.010639	0	0	7.6856e-07	2.5919e-06	0	0	0	8.8818e-12	NA	0	0	0	0.41772	0.94544	0.88489	0.60864	0.23852	0.077129	0.019473	0.012142	0.011061	1.8492e-07	0.00021912	2.109e-06	0.025085	0.0046262
PEF	1.5329e-05	0.00074123	2.2367e-05	2.0706e-05	0.027973	0.00031941	0	0	1.3475e-06	0	4.4409e-12	0	2.2204e-11	6.5503e-10	0	NA	0	0	0.52004	0.46285	0.88673	0.68787	0.47321	0.20822	0.048426	0.030009	0.029426	0.00035871	4.3539e-06	9.5923e-08	0.019741	0.00094282
FEV1	1.2657e-08	0.00026786	6.0307e-09	2.1667e-08	9.736e-05	5.6639e-05	0	2.2204e-12	6.0507e-09	4.1477e-07	0	0	0	0	0	0	NA	0	0.57606	0.75222	0.87935	0.57206	0.12355	0.02235	0.0036785	0.0034903	0.0024295	4.885e-12	3.5301e-07	5.9552e-09	0.0080835	0.00085656
FEV1_post	5.8482e-06	1.221e-05	1.8924e-05	0.00034046	9.1438e-09	1.5032e-06	0	0	0	0	8.8818e-12	8.8818e-12	0	0	0	0	0	NA	0.65971	0.96984	0.79212	0.49382	0.1923	0.029863	0.0025498	0.0045526	0.0025054	1.4078e-09	0.00010841	4.4373e-06	0.016252	0.0023877
K/L	0.60564	0.84293	0.83977	0.94839	0.83662	0.47014	0.53896	0.71828	0.96577	0.81718	0.81045	0.80533	0.99916	0.59206	0.41772	0.52004	0.57606	0.65971	NA	0.35296	0.899	0.41203	0.79691	0.98618	0.96557	0.14902	0.0068899	0.78799	0.57409	0.92141	0.88103	0.28688
FENO	0.52027	0.69612	0.25186	0.3635	0.4572	0.59625	0.78348	0.18055	0.72129	0.35691	0.43983	0.71643	0.49008	0.69667	0.94544	0.46285	0.75222	0.96984	0.35296	NA	0.13343	0.091021	0.029961	0.066986	0.31752	0.15189	0.18892	0.096385	0.84388	0.68725	0.62388	0.63564
Total_IgE	0.12637	0.6343	0.67286	0.41394	0.9157	0.97366	0.60981	0.47288	0.6355	0.83571	0.27846	0.56497	0.9399	0.56615	0.88489	0.88673	0.87935	0.79212	0.899	0.13343	NA	0.00017154	0.26238	0.27172	0.65204	0.58601	0.60066	0.95262	0.24423	0.52207	0.77115	0.9595
Specific_IgE	0.76823	0.68698	0.84951	0.72901	0.48837	0.27869	0.51466	0.65201	0.57976	0.74698	0.76324	0.7836	0.21019	0.089845	0.60864	0.68787	0.57206	0.49382	0.41203	0.091021	0.00017154	NA	0.0084438	0.011004	0.27506	0.25753	0.24918	0.37303	0.94735	0.8579	0.11189	0.94532
Eosinoph_number	0.60365	0.49874	0.13245	0.10458	0.43139	0.44003	0.26776	0.80943	0.96698	0.29578	0.58652	0.80333	0.037929	0.135	0.23852	0.47321	0.12355	0.1923	0.79691	0.029961	0.26238	0.0084438	NA	0	0.61284	0.00078261	0.00018419	0.1009	0.0013443	0.079788	0.67814	0.71287
Eosinoph_percent	0.9352	0.85554	0.017845	0.028347	0.067369	0.15918	0.066899	0.40683	0.40127	0.73765	0.21709	0.74057	0.0034423	0.017241	0.077129	0.20822	0.02235	0.029863	0.98618	0.066986	0.27172	0.011004	0	NA	0.029678	0.00017377	0.20704	0.014552	0.00034653	0.014055	0.55008	0.64574
Kfree	0.57438	0.646	0.0033839	0.042874	0.003795	0.0019117	0.013579	0.048772	0.069247	0.26162	0.070639	0.14855	0.0021954	0.00013938	0.019473	0.048426	0.0036785	0.0025498	0.96557	0.31752	0.65204	0.27506	0.61284	0.029678	NA	0	0	0.16667	0.00039176	0.0076929	0.8651	0.0035562
Lfree	0.39407	0.70604	0.003612	0.039988	0.011893	0.025741	0.017006	0.057911	0.094595	0.32803	0.053426	0.10472	0.0043669	0.0033221	0.012142	0.030009	0.0034903	0.0045526	0.14902	0.15189	0.58601	0.25753	0.00078261	0.00017377	0	NA	0	0.00015513	0.00045479	0.01305	0.95443	0.00088305
KplusL	0.44108	0.67075	0.002427	0.033746	0.005738	0.0078835	0.011915	0.045388	0.072776	0.28286	0.050371	0.10656	0.0023078	0.00069326	0.011061	0.029426	0.0024295	0.0025054	0.0068899	0.18892	0.60066	0.24918	0.00018419	0.20704	0	0	NA	0.34101	0.00024899	0.0079543	0.91962	0.00099747
Age	0.06929	0.019721	9.7122e-07	0.039795	0.00011973	0.18458	1.3956e-05	0.001318	0.015526	0.28881	7.0726e-05	0.0053325	8.8818e-12	1.168e-10	1.8492e-07	0.00035871	4.885e-12	1.4078e-09	0.78799	0.096385	0.95262	0.37303	0.1009	0.014552	0.16667	0.00015513	0.34101	NA	0.015915	0.0075087	0.0068241	0.027615
Neutroph_number	0.011856	0.021423	1.2158e-07	1.5626e-06	0.0019883	0.0049308	0.007808	0.00097871	0.0015312	0.0014273	2.0792e-08	5.5008e-07	4.0036e-07	0.00030259	0.00021912	4.3539e-06	3.5301e-07	0.00010841	0.57409	0.84388	0.24423	0.94735	0.0013443	0.00034653	0.00039176	0.00045479	0.00024899	0.015915	NA	0	0.017446	0.0068518
Neutroph_percent	0.00092451	0.011769	1.088e-11	2.4136e-08	3.9986e-05	0.00036408	0.017734	8.9818e-05	2.4426e-05	7.7678e-06	8.8818e-12	1.199e-10	1.0858e-08	2.4192e-05	2.109e-06	9.5923e-08	5.9552e-09	4.4373e-06	0.92141	0.68725	0.52207	0.8579	0.079788	0.014055	0.0076929	0.01305	0.0079543	0.0075087	0	NA	0.0040768	0.15963
Pack/years	0.032352	0.32224	0.0083072	0.014111	0.01682	0.040766	0.083243	0.028733	0.020162	0.03007	0.006621	0.01378	0.004603	0.012505	0.025085	0.019741	0.0080835	0.016252	0.88103	0.62388	0.77115	0.11189	0.67814	0.55008	0.8651	0.95443	0.91962	0.0068241	0.017446	0.0040768	NA	0.23363
CRP	0.026791	0.42374	0.00014274	0.0012106	0.00094798	0.0041182	0.022579	0.0022194	0.0034414	0.0023952	0.00045056	0.00049887	0.0011759	0.0032764	0.0046262	0.00094282	0.00085656	0.0023877	0.28688	0.63564	0.9595	0.94532	0.71287	0.64574	0.0035562	0.00088305	0.00099747	0.027615	0.0068518	0.15963	0.23363	NA
